# Supplementary material for: Identification of Z-Tyr-Ala-CHN2, a Cathepsin L Inhibitor with Broad-Spectrum Cell-Specific Activity against Coronaviruses, including SARS-CoV-2
Source: MDPI journal article supplement (doi:10.3390/microorganisms11030717), 2023-03-10
Supplement: s1 [file s1]

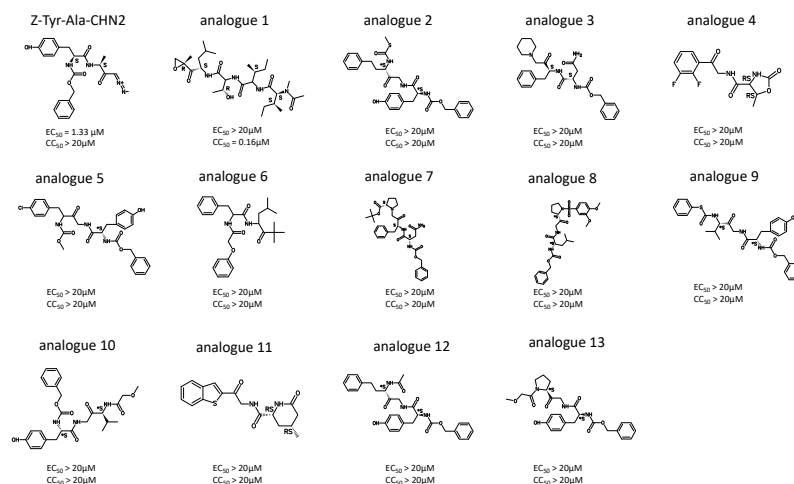

**Figure S1.** Structure and activity data (EC<sub>50</sub> and CC<sub>50</sub>) of Z-Tyr-Ala-CHN<sub>2</sub> ( $n = 2$ ) and its analogues ( $n = 1$ ) derived from the primary screen in VeroE6-eGFP cells. EC<sub>50</sub> values were obtained from a CPE reduction assay against SARS-CoV-2. CC<sub>50</sub> values were obtained from the toxicity counter screen which was performed on the same cell line using the ATPlite readout.  $n$  indicates the number of independent experiments.

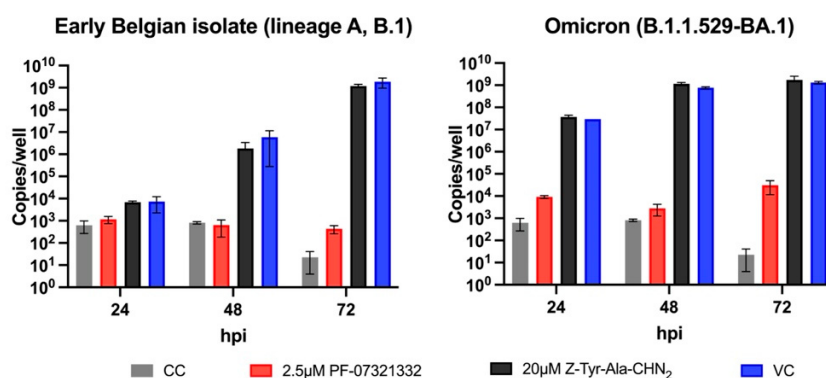

**Figure S2.** Z-Tyr-Ala-CH<sub>2</sub> does not inhibit SARS-CoV-2 infection in an upper respiratory tract model. HNEC ALI cultures were infected with the indicated isolates and treated with PF-07321332 at 2.5 μM (red) and Z-Tyr-Ala-CHN<sub>2</sub> at 20 μM (black). Cell control (CC; grey bars, DMSO 0.2%). Virus control (VC; blue bars, MOI 0.1 without compound). The mean ± SD from within one representative experiment is shown. Within each experiment, conditions are performed in duplicate. DMSO, dimethyl sulfoxide.

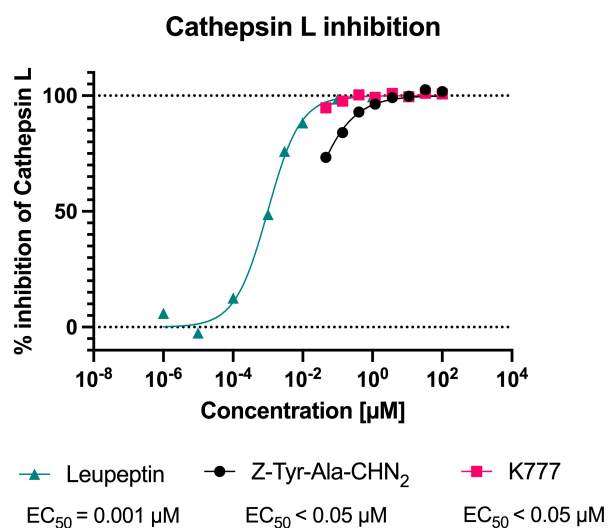

**Figure S3.** Enzymatic Cathepsin L assay demonstrating that both Z-Tyr-Ala-CHN<sub>2</sub> and K777 inhibit Cathepsin L with EC<sub>50</sub> < 0.05 μM. Leupeptin, an inhibitor of endosomal trypsin-like serine and cysteine proteases, was included as a positive control, whereas water was included as a negative control. The graph represents one experiment performed to confirm observations from literature.
